# Supplementary material for: Phosphatidylinositol- and phosphatidylcholine-transfer activity of PITPβ is essential for COPI-mediated retrograde transport from the Golgi to the endoplasmic reticulum
Source: Oxford University Press journal article supplement (doi:10.1242/jcs.061986), 2010-03-24

**A**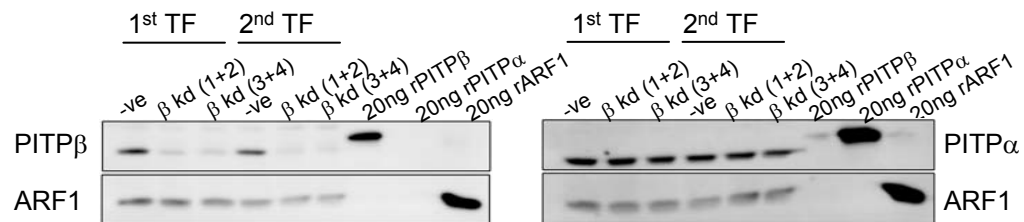

|        |                | Arbitrary units |         | PITPβ/ARF1 | % Max | % reduction |
|--------|----------------|-----------------|---------|------------|-------|-------------|
|        |                | PITPβ           | ARF1    |            |       |             |
| 1st TF | -ve            | 1763762         | 1528039 | 1.154      | 100%  | 0%          |
|        | PITPβ kd (1+2) | 230965          | 1274272 | 0.181      | 16%   | 84%         |
|        | PITPβ kd (3+4) | 172081          | 1039108 | 0.166      | 14%   | 86%         |
| 2nd TF | -ve            | 1254866         | 752097  | 1.668      | 100%  | 0%          |
|        | PITPβ kd (1+2) | 70924           | 583396  | 0.122      | 7%    | 93%         |
|        | PITPβ kd (3+4) | 17073           | 519099  | 0.033      | 2%    | 98%         |

**B**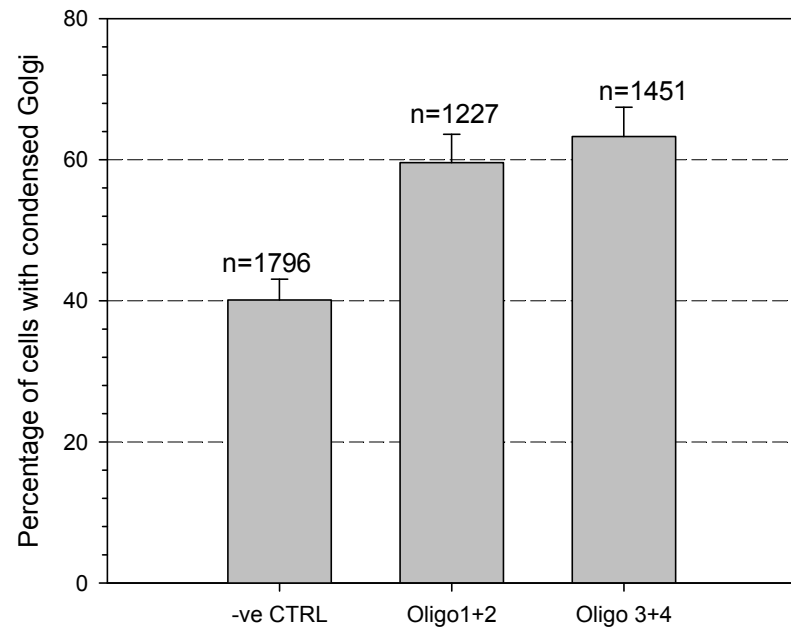**C**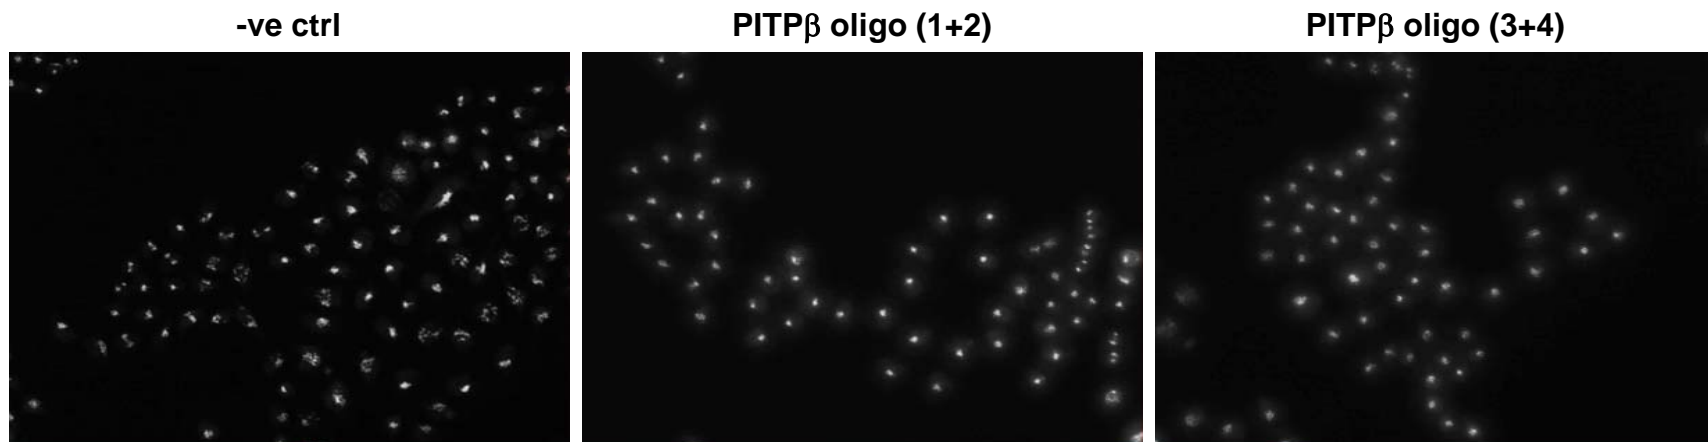

Supplement: jcs061986-sup-061986figs1.pdf [file jcs061986-sup-061986figs1.pdf]
