# Supplementary material for: Phosphatidylinositol- and phosphatidylcholine-transfer activity of PITPβ is essential for COPI-mediated retrograde transport from the Golgi to the endoplasmic reticulum
Source: Oxford University Press journal article supplement (doi:10.1242/jcs.061986), 2010-03-24
Supplement: jcs061986-sup-061986figs2.pdf [file jcs061986-sup-061986figs2.pdf]

**A****-ve ctrl siRNA****PITP $\beta$  kd**

PDI (ER marker)

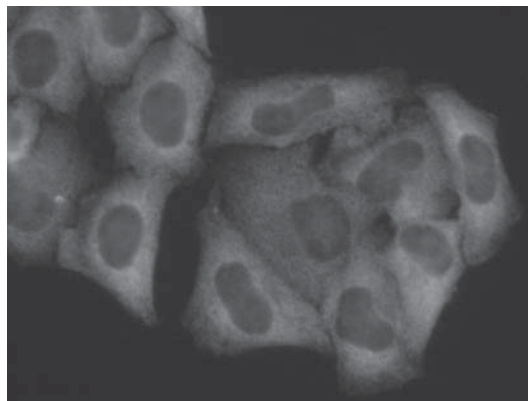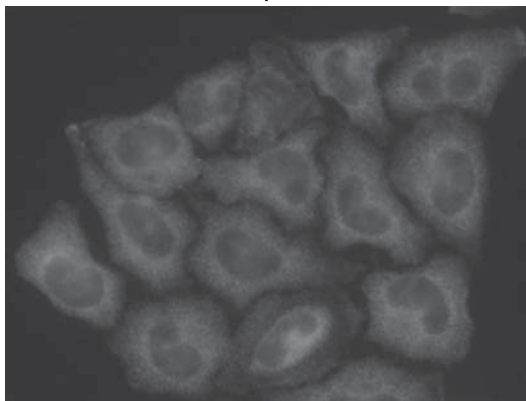

TGN38

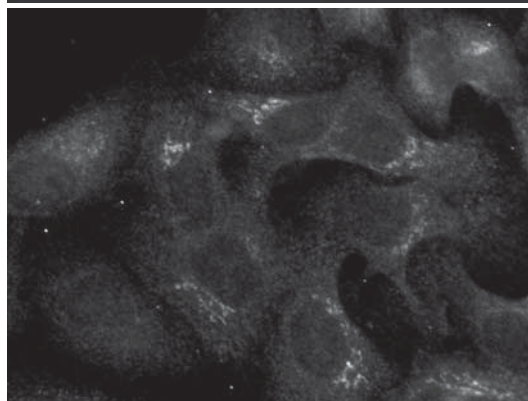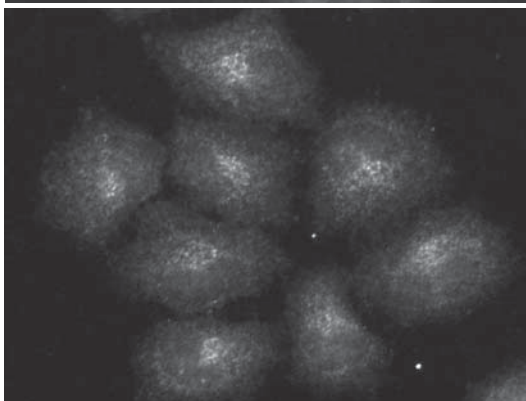**X40****B****Solvent control (DMSO)****Latrunculin B, 500nM, 15 min.**

Actin / GM130

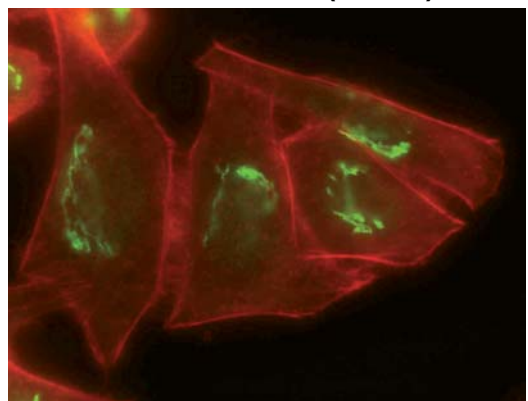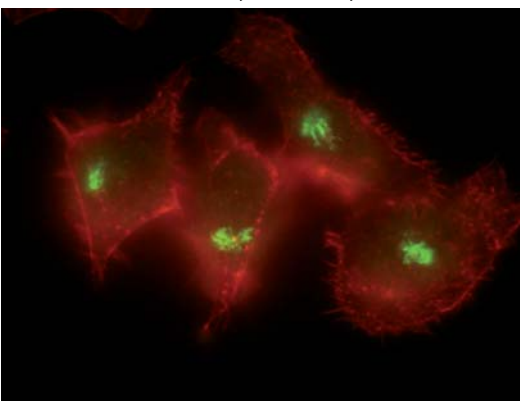

DAPI

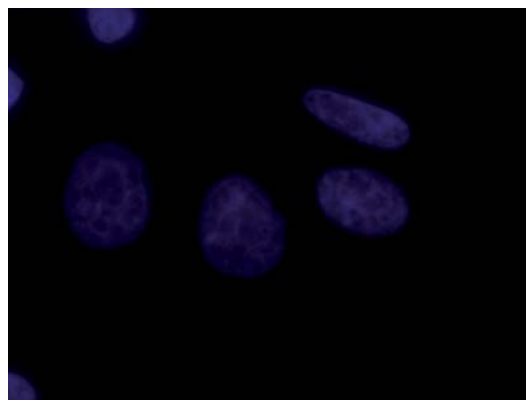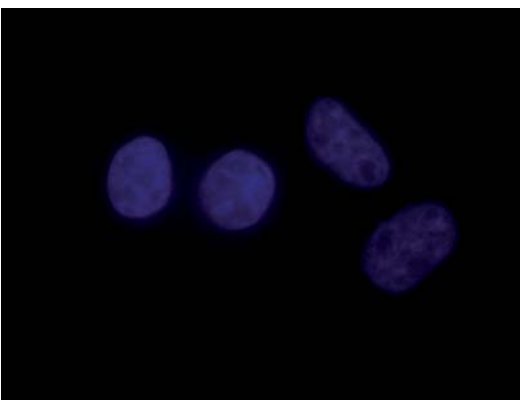**X100**
