# Supplementary material for: Phosphatidylinositol- and phosphatidylcholine-transfer activity of PITPβ is essential for COPI-mediated retrograde transport from the Golgi to the endoplasmic reticulum
Source: Oxford University Press journal article supplement (doi:10.1242/jcs.061986), 2010-03-24
Supplement: jcs061986-sup-061986tables1.pdf [file jcs061986-sup-061986tables1.pdf]

**Table S1**

|                                                | Golgi compaction | Defect in Retrograde transport (Golgi to ER) | Nuclear Shape | Recruitment of Arp2/3 to Golgi | References                                |
|------------------------------------------------|------------------|----------------------------------------------|---------------|--------------------------------|-------------------------------------------|
| PITP $\beta$ siRNA                             | yes              | yes                                          | yes           | not known                      | This paper                                |
| Expression of Syne-1 fragments or Syne-1 siRNA | yes              | yes                                          | yes           | not known                      | (Gough and Beck, 2004; Dawe et al., 2009) |
| Latrunculin                                    | yes              | yes                                          | no            | not known                      | (Valderrama et al., 2001)                 |
| ARF1.Q71L                                      | yes              | yes                                          | not known     | yes                            | (Dubois et al., 2005; Zhang et al., 1994) |
| Active Cdc42                                   | yes              | yes                                          | not known     | yes                            | (Luna et al., 2002)                       |
| PLD2 siRNA                                     | not known        | yes                                          | not known     | not known                      | (Yang et al., 2008)                       |
| INPP5B PIP <sub>2</sub> phosphatase            | not known        | yes                                          | not known     | not known                      | (Williams et al., 2007)                   |

## References

**Dawe, H.R., Adams, M., Wheway, G., Szymanska, K., Logan, C. V., Noegel, A. A., Gull, K., and Johnson, C. A.** (2009). Nesprin-2 interacts with meckelin and mediates ciliogenesis via remodelling of the actin cytoskeleton. *J. Cell Sci.* **122**, 2716-2726.

**Dubois, T., Paleotti, O., Mironov, A. A., Fraasier, V., Stradal, T. E., De Matteis, M. A., Franco, M., and Chavrier, P.** (2005). Golgi-localized GAP for Cdc42 functions downstream of ARF1 to control Arp2/3 complex and F-actin dynamics. *Nat. Cell Biol* **7**, 353-364.

**Gough, L.L. and Beck, K. A.** (2004). The spectrin family member Syne-1 functions in retrograde transport from Golgi to ER. *Biochim. Biophys Acta* **1693**, 29-36.

**Luna, A., Matas, O. B., Martinez-Menarguez, J. A., Mato, E., Duran, J. M., Ballesta, J., Way, M., and Egea, G.** (2002). Regulation of protein transport from the Golgi complex to the endoplasmic reticulum by CDC42 and N-WASP. *Mol Biol Cell* **13**, 866-879.

**Valderrama, F., Duran, J. M., Babia, T., Barth, H., Renau-Piqueras, J., and Egea, G.** (2001). Actin microfilaments facilitate the retrograde transport from the Golgi complex to the endoplasmic reticulum in mammalian cells. *Traffic*. **2**, 717-726.

**Williams, C., Choudhury, R., McKenzie, E., and Lowe, M.** (2007). Targeting of the type II inositol polyphosphate 5-phosphatase INPP5B to the early secretory pathway. *J. Cell Sci.* **120**, 3941-3951.

**Yang, J.S., Gad, H., Lee, S. Y., Mironov, A., Zhang, L., Beznoussenko, G. V., Valente, C., Turacchio, G., Bonsra, A. N., Du, G., Baldanzi, G., Graziani, A., Bourgoin, S., Frohman, M. A., Luini, A., and Hsu, V. W.** (2008). A role for phosphatidic acid in COPI vesicle fission yields insights into Golgi maintenance. *Nat. Cell Biol* **10**, 1146-1153.

**Zhang, C.-J., Rosenwald, A. G., Willingham, M. C., Skuntz, S., Clark, J., and Kahn, R. A.** (1994). Expression of a dominant allele of human ARF1 inhibits membrane traffic in vivo. *J. Cell Biol.* **124**, 289-300.
