# Supplementary figures and images for: Phosphatidylinositol- and phosphatidylcholine-transfer activity of PITPβ is essential for COPI-mediated retrograde transport from the Golgi to the endoplasmic reticulum
Source: Oxford University Press journal article supplement (doi:10.1242/jcs.061986), 2010-03-24

Control

PITPβ kd

Actin

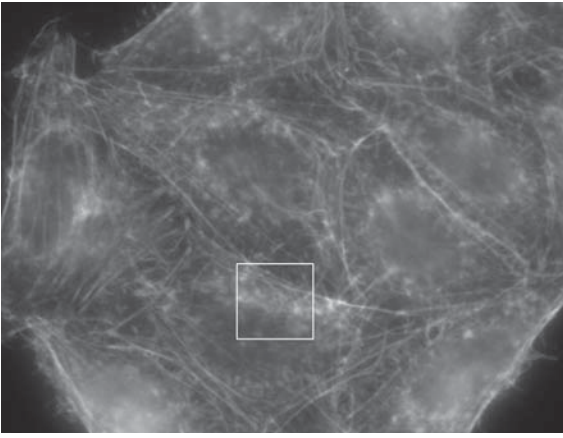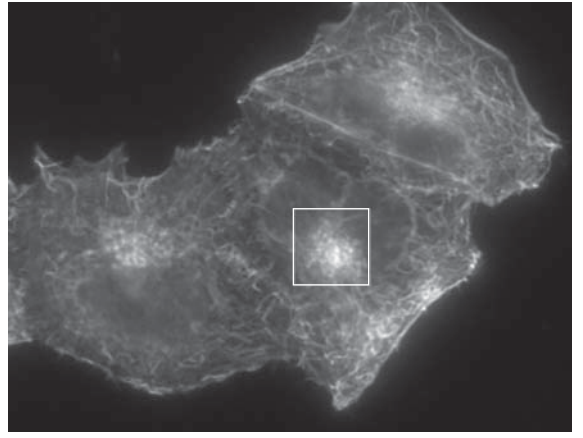

Giantin

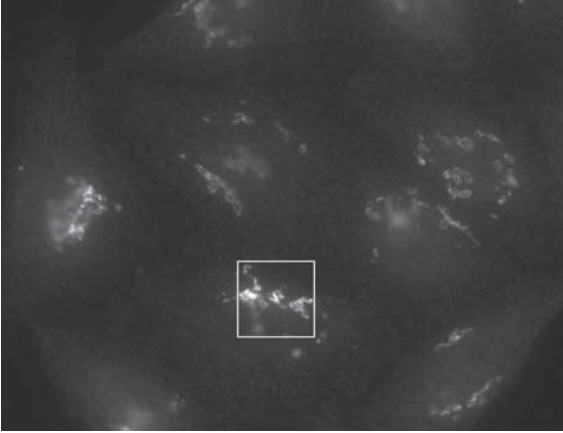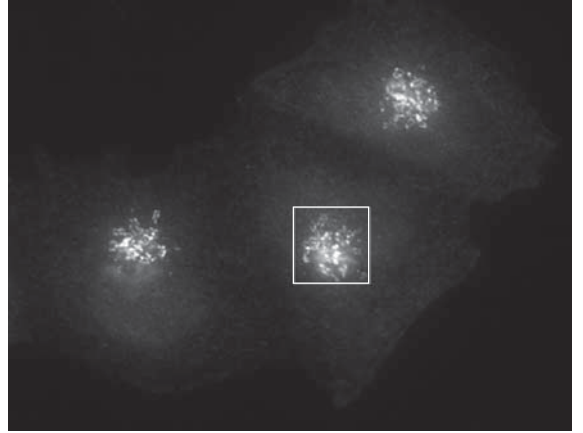

DAPI

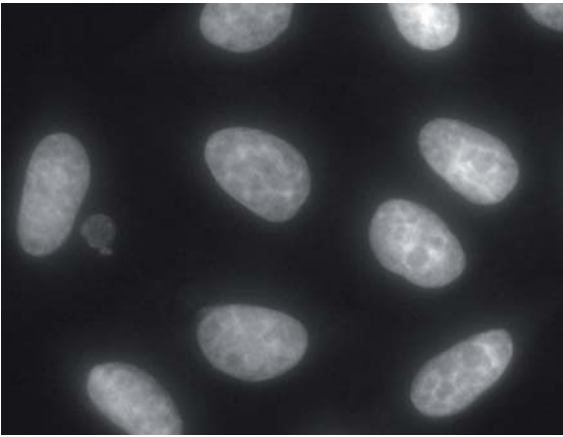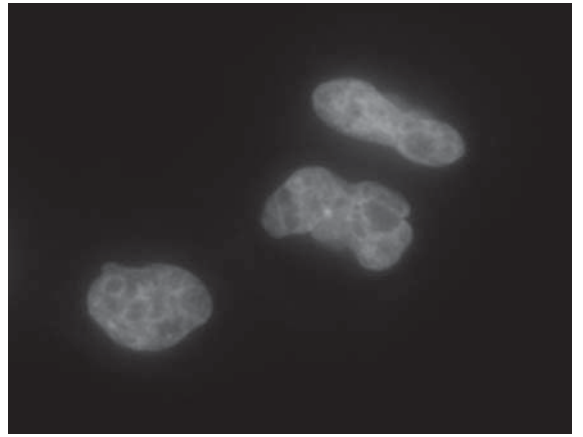

DAPI/Giantin/Actin

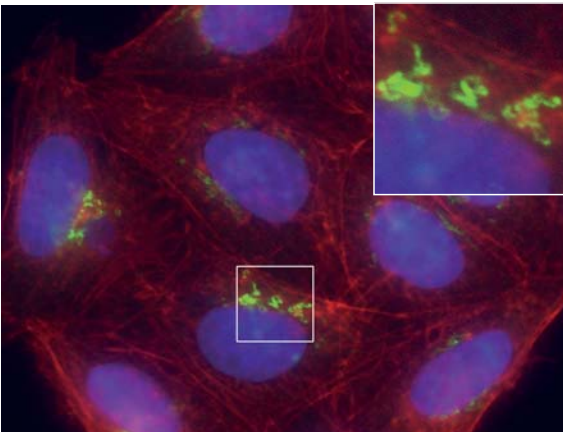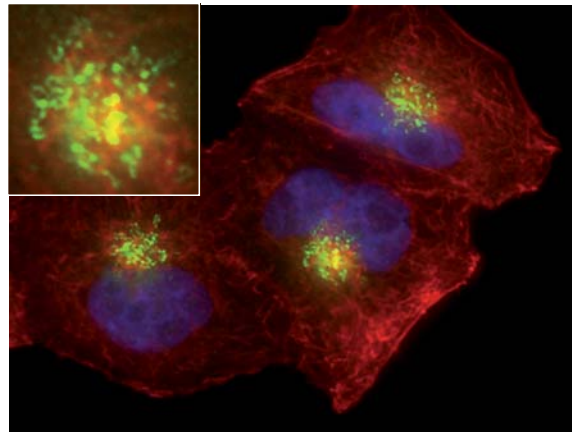

X100

Supplement: jcs061986-sup-061986figs3.pdf [file jcs061986-sup-061986figs3.pdf]

-ve ctrl

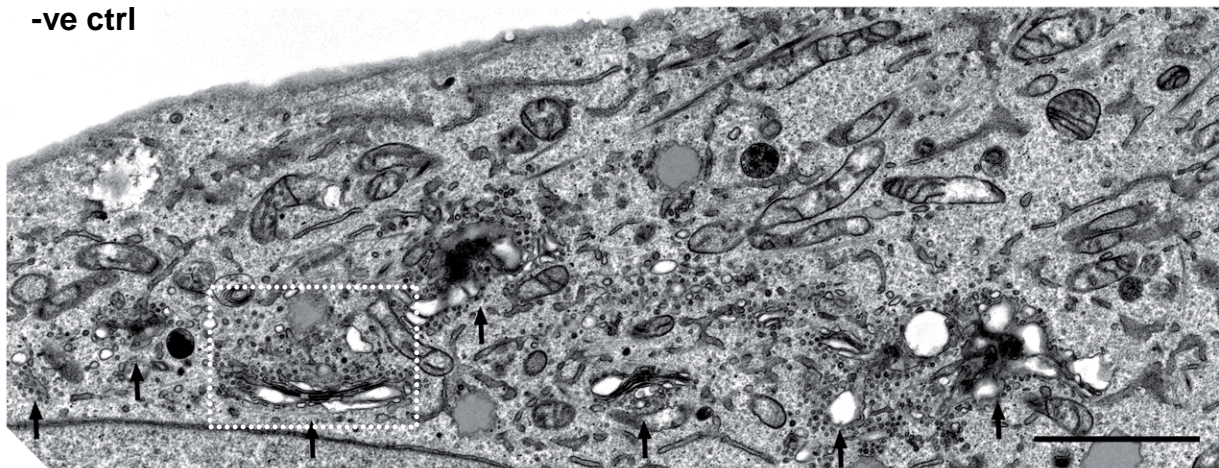

PITP $\beta$  kd

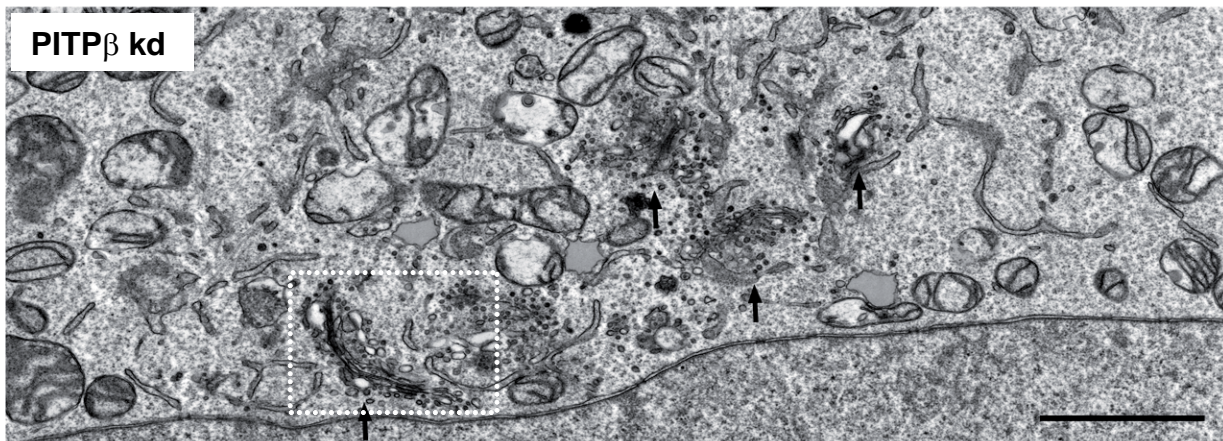

-ve ctrl

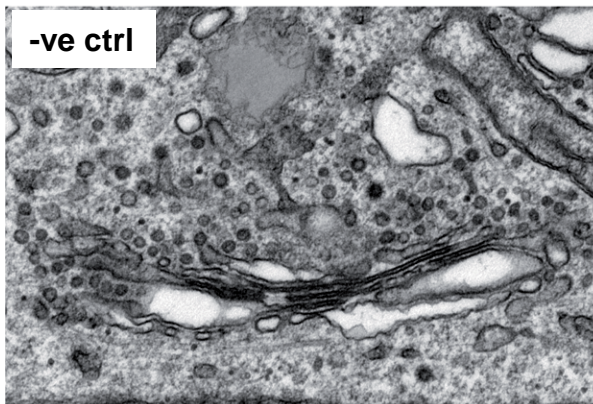

PITP $\beta$  kd

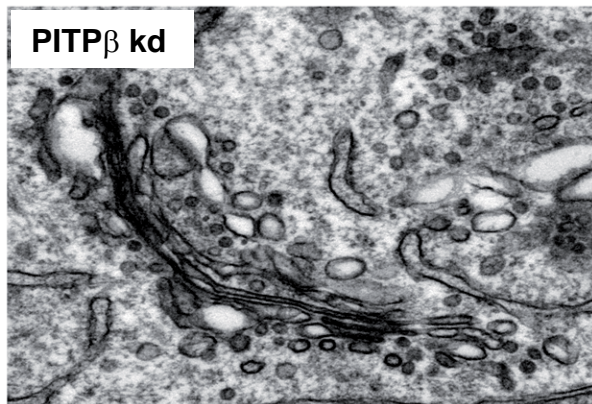

Supplement: jcs061986-sup-061986figs4.pdf [file jcs061986-sup-061986figs4.pdf]

Ctrl

10 $\mu$ g/ml BFA - 30 min

-ve ctrl siRNA

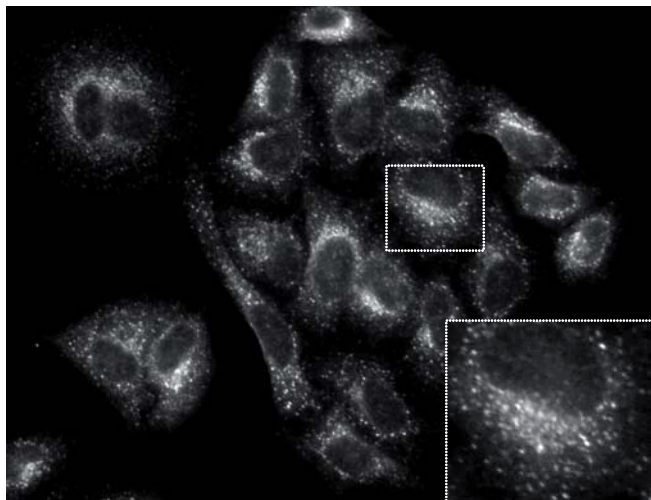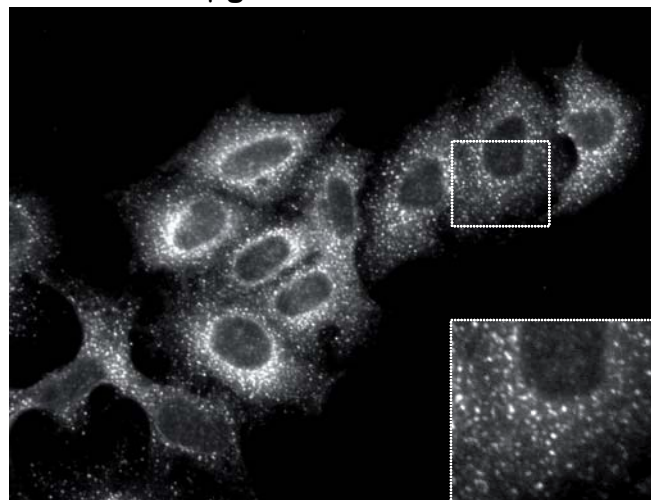

PITP $\beta$  kd

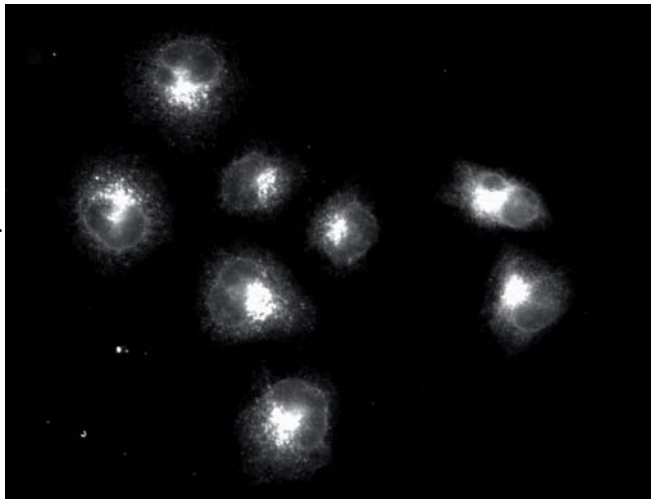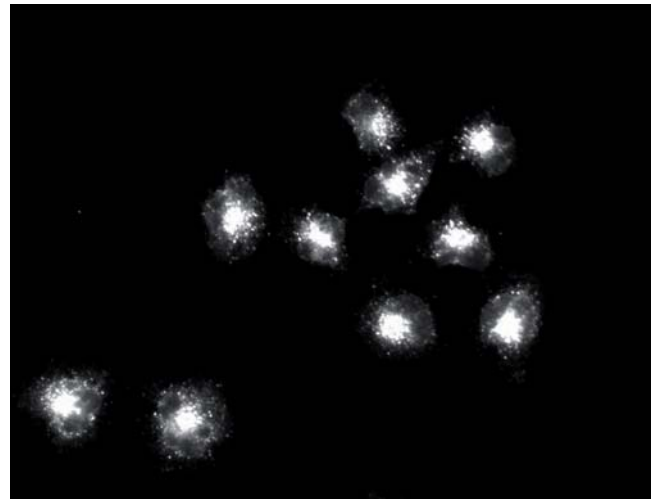

Supplement: jcs061986-sup-061986figs5.pdf [file jcs061986-sup-061986figs5.pdf]

-ve ctrl siRNA

siRNA oligo 1+2

siRNA oligo 3+4

GIANTIN

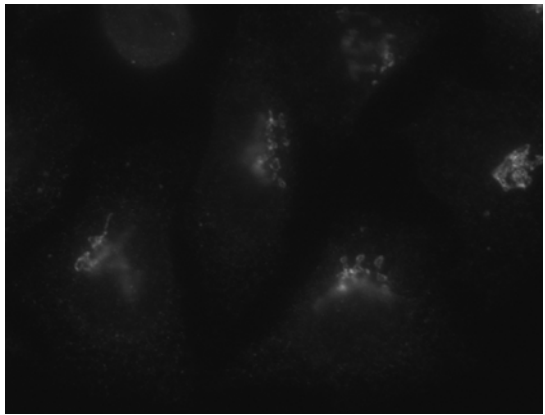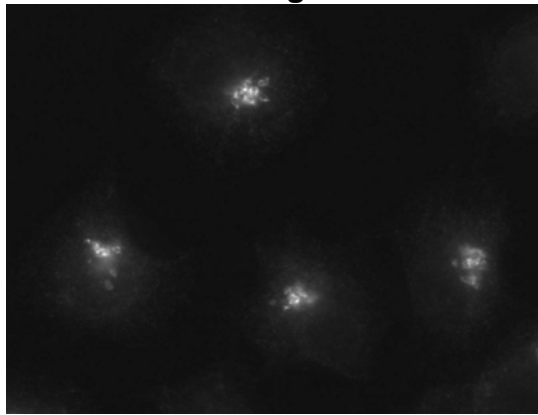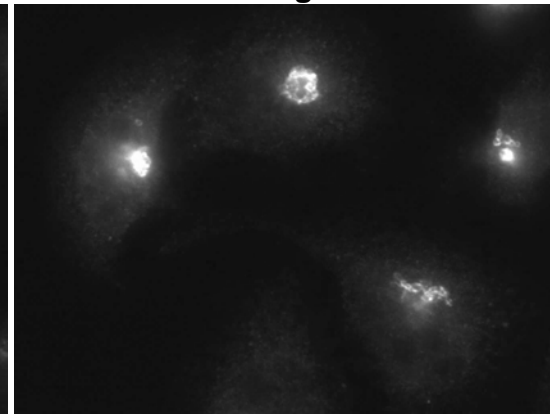

ERGIG 53

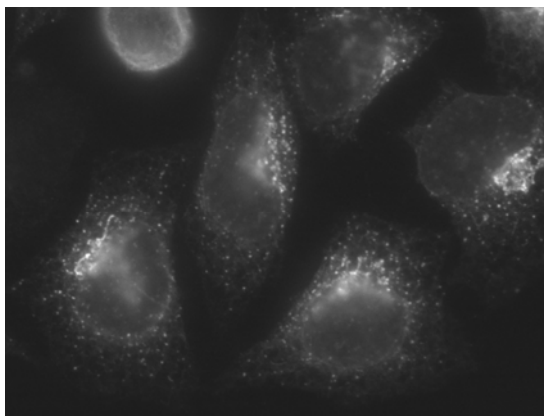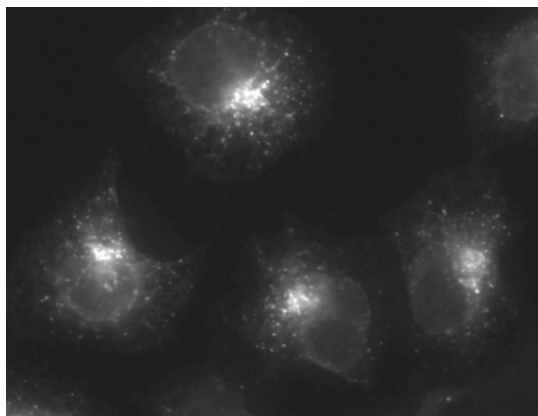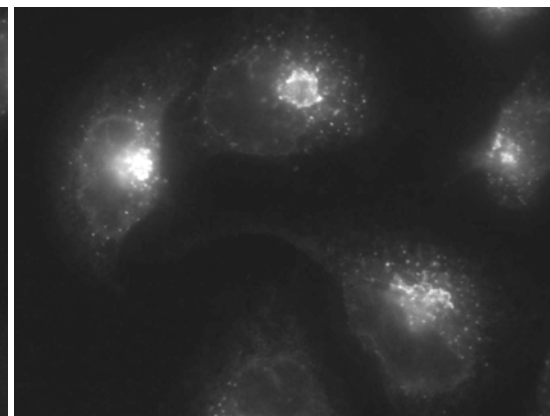

ERGIG 53 / GIANTIN

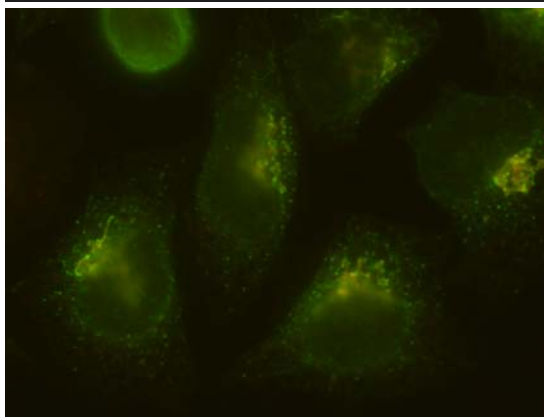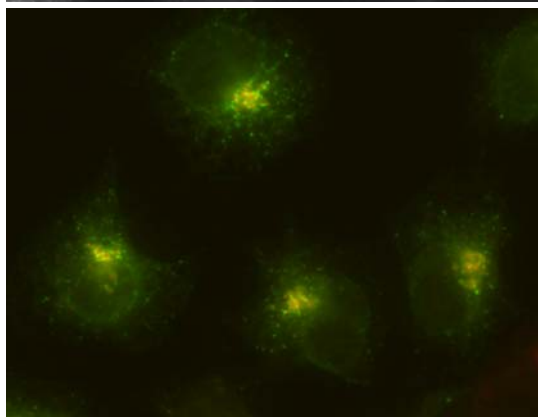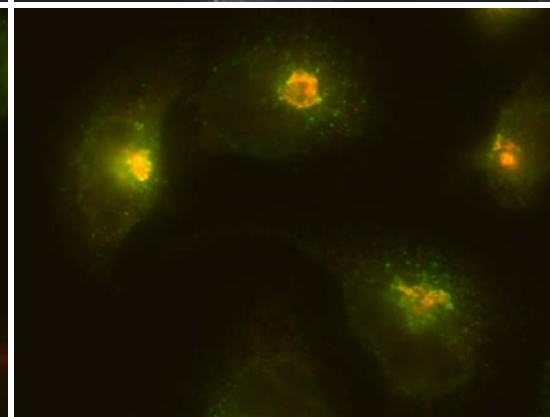

Supplement: jcs061986-sup-061986figs6.pdf [file jcs061986-sup-061986figs6.pdf]

**A**

ve ctrl siRNA

PITP $\beta$  kd

ARF-GAP1

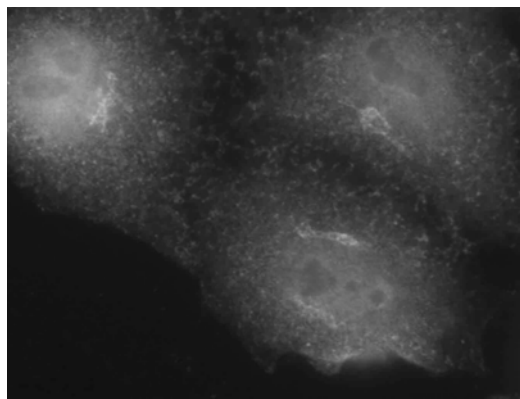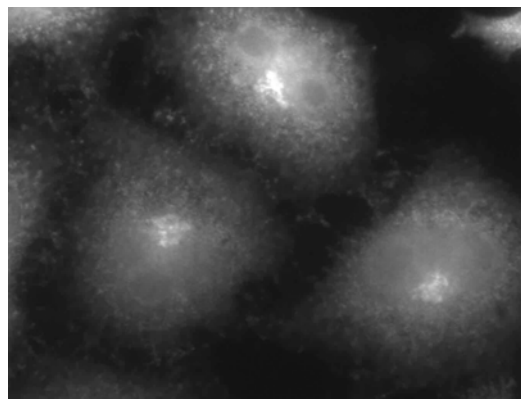

DAPI

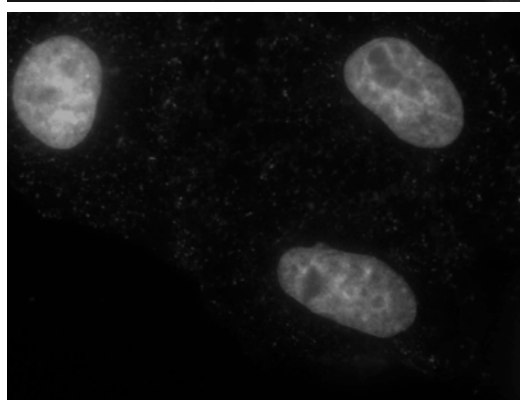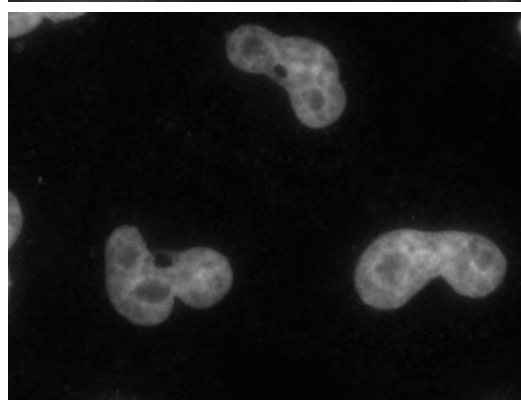**B**

ctrl

60  $\mu$ M Propranolol - 15min

ARF-GAP1

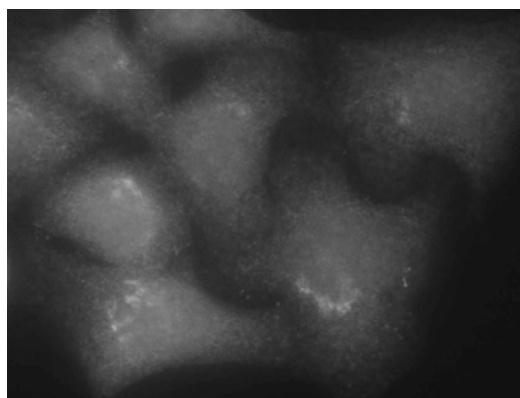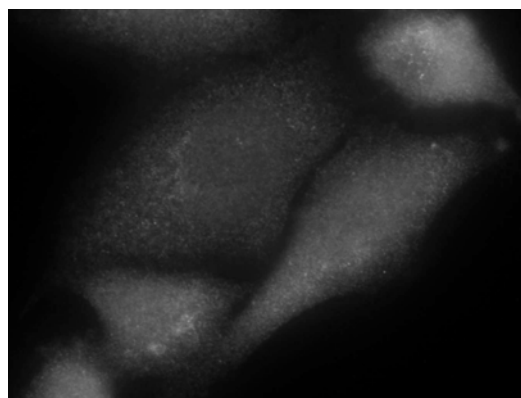

ERGIC-53

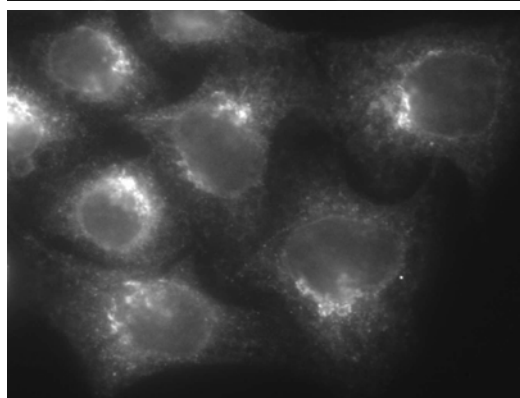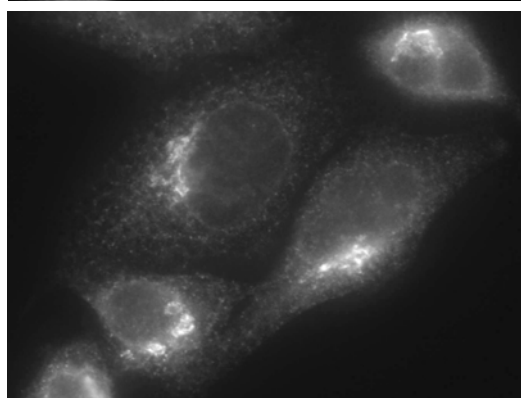

Supplement: jcs061986-sup-061986figs7.pdf [file jcs061986-sup-061986figs7.pdf]

**A**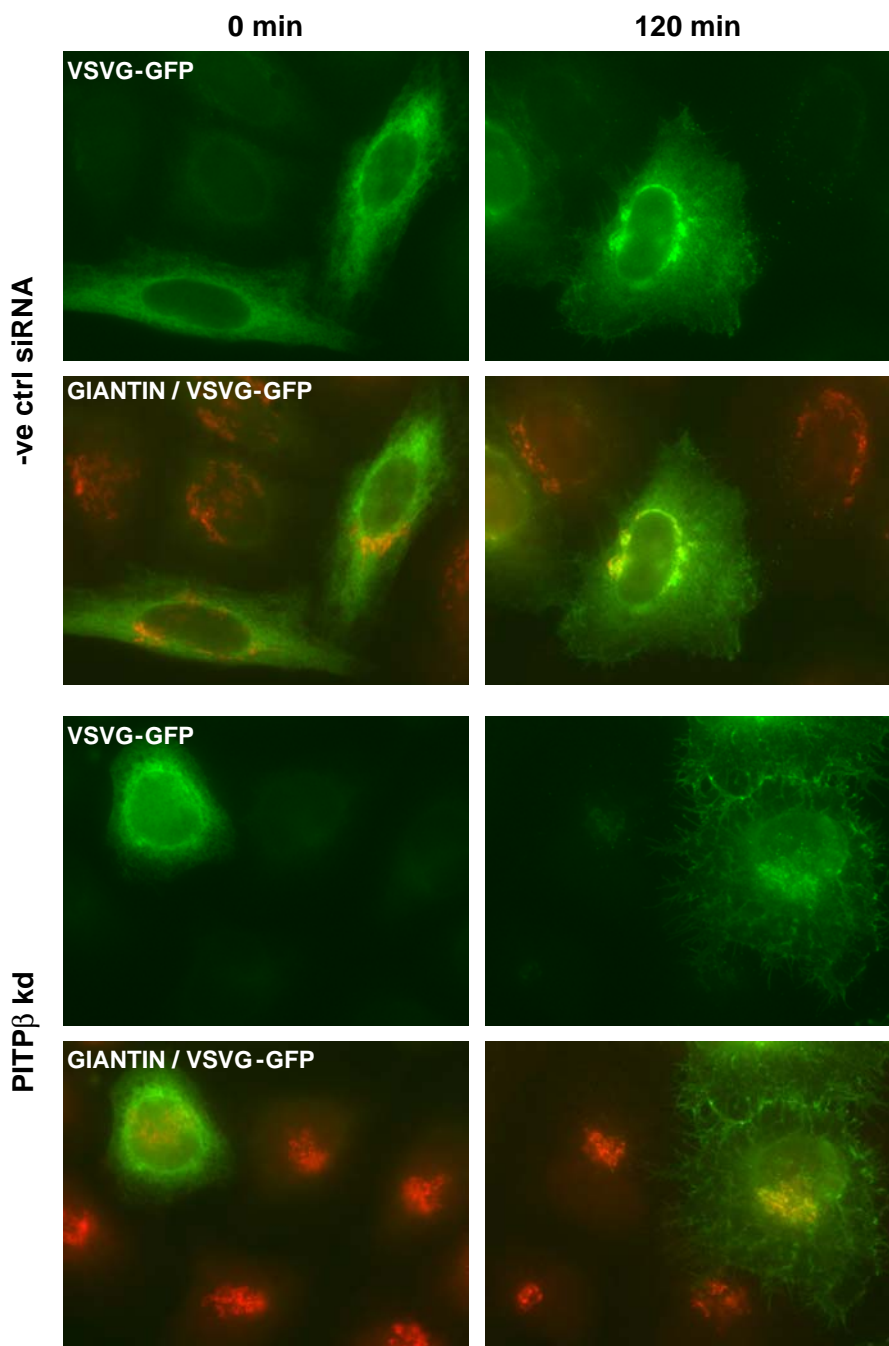**B**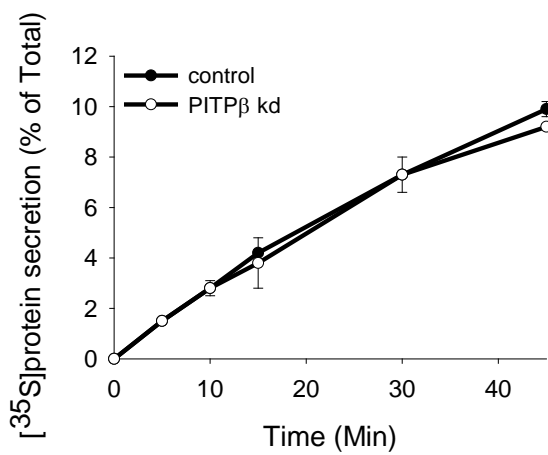

Supplement: jcs061986-sup-061986figs8.pdf [file jcs061986-sup-061986figs8.pdf]

**A**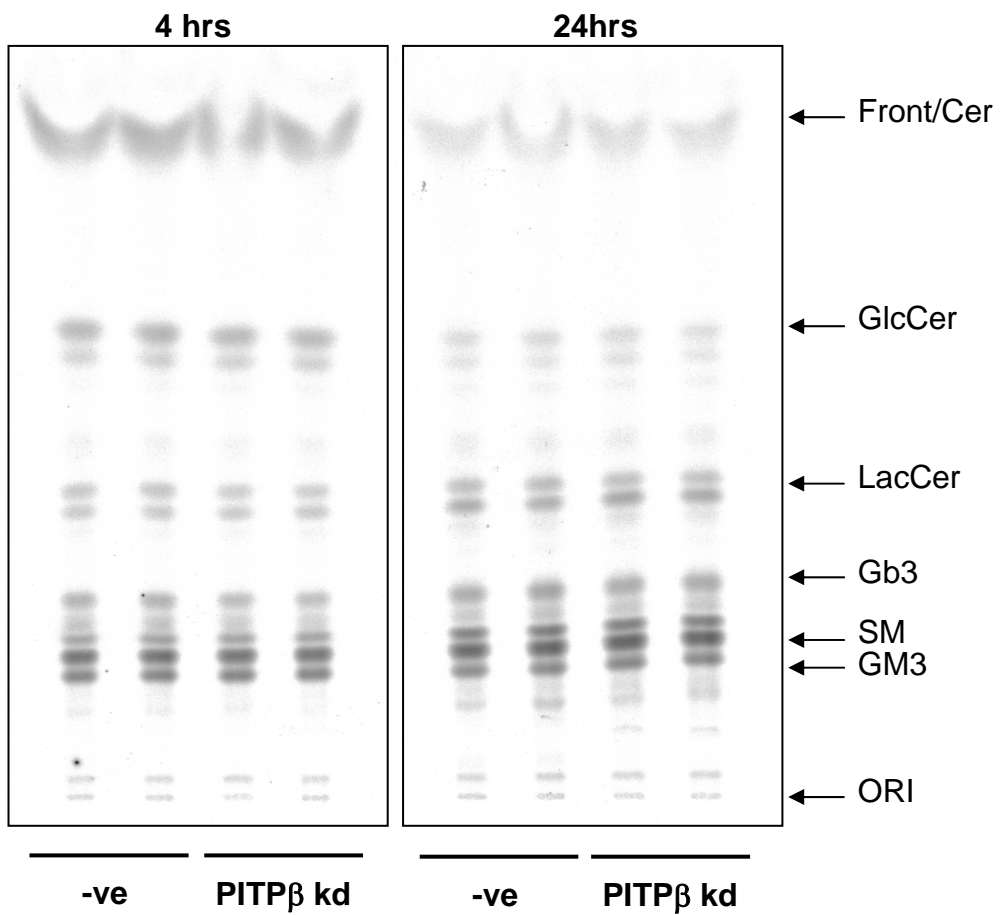**B**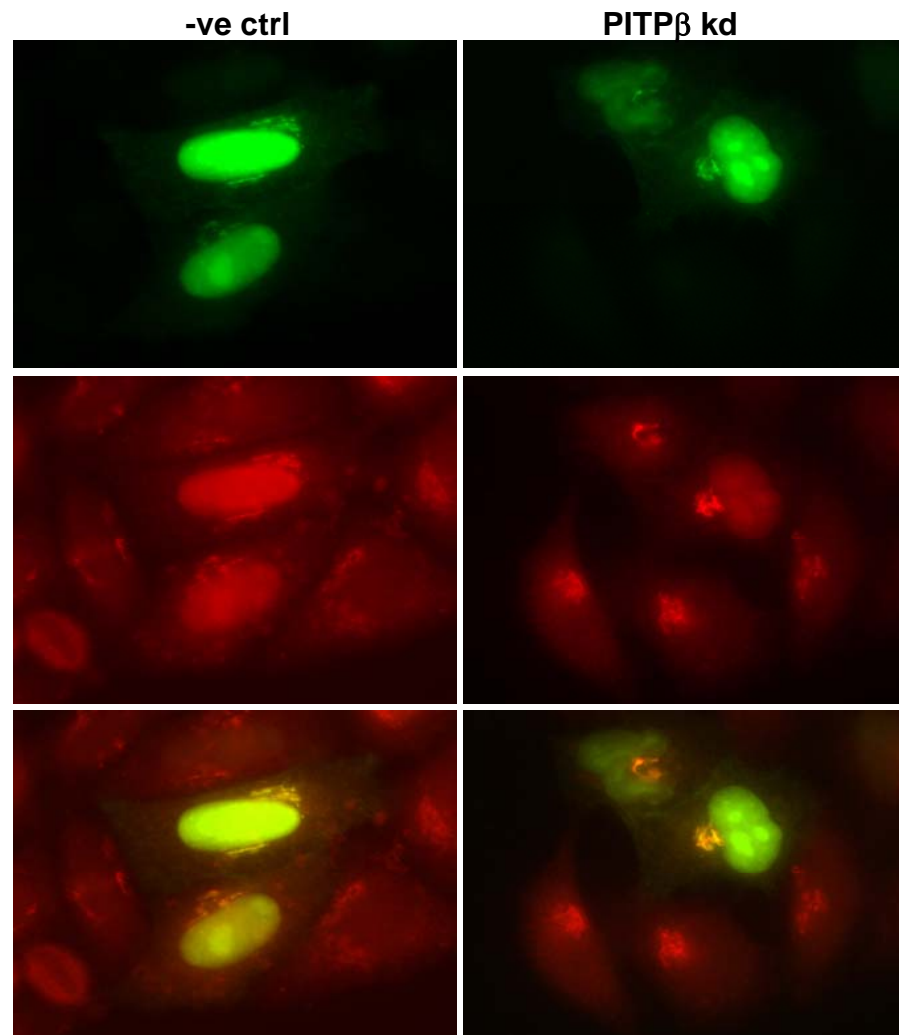

Supplement: jcs061986-sup-061986figs9.pdf [file jcs061986-sup-061986figs9.pdf]
